# Supplementary material for: miRNA Gene Promoters Are Frequent Targets of Aberrant DNA Methylation in Human Breast Cancer
Source: PubMed Central journal article supplement (PMC3547033; doi:10.1371/journal.pone.0054398), 2013-01-16
Supplement: pone.0054398.s003.pdf [file pone.0054398.s003.pdf]

**Table S2**

Positions of MassARRAY amplicons in hg18 and sequences of MassARRAY primers used for DNA methylation analysis

| chr   | start       | end         | amplicon name     | 10F primer sequence                     | T7R primer sequence                                        |
|-------|-------------|-------------|-------------------|-----------------------------------------|------------------------------------------------------------|
| chr9  | 21,549,054  | 21,549,490  | mir-31            | aggaagagagTTTTTTTAAGAAGGGAAAGTTAGTTA    | cagtaatacgactcactataggagaaggctCAAATAAACTAAAAAACCTTAATCCC   |
| chr11 | 57,161,896  | 57,162,383  | mir-130a          | aggaagagagAGGTTTTTATTGGTTGTGGGTTAAT     | cagtaatacgactcactataggagaaggctTTCTAAAACTACCTCTTCTAACCA     |
| chr22 | 44,856,162  | 44,856,743  | let-7a-3/let7b    | aggaagagagTGGGTGGTATGAATTTTTAGTTTG      | cagtaatacgactcactataggagaaggctAAAATCCCTCAAAAACCTTAAATC     |
| chr1  | 98,284,168  | 98,284,631  | mir-137           | aggaagagagGTTTAGTGGTTAGTTGGTGGTTG       | cagtaatacgactcactataggagaaggctATACCCAAAAACCTTACCACATCT     |
| chr21 | 25,855,810  | 25,856,217  | mir-155           | aggaagagagTGTTTGTGTTTGGAAATTTATAGTTTGA  | cagtaatacgactcactataggagaaggctCCATTTCTTCTCTTAAAAACCTA      |
| chr16 | 68,516,150  | 68,516,613  | mir-140           | aggaagagagGGTTAAGTGAGTTTTGGAAAAGGT      | cagtaatacgactcactataggagaaggctCAACTTCAAATTCAAACAAAAAAA     |
| chr1  | 40,947,229  | 40,947,768  | mir-30e/mir-30c-1 | aggaagagagTAGGAGATGTAGAAATATGAGTTTGGAA  | cagtaatacgactcactataggagaaggctAAACTCTAACCAACCAATAAAAAATCCC |
| chr7  | 25,956,149  | 25,956,538  | mir-148a          | aggaagagagGTTTTAGTTTTTTAGATGGGAAGGT     | cagtaatacgactcactataggagaaggctATCTTCTCCAAAAATTTCTCTCTA     |
| chr11 | 110,888,268 | 110,888,617 | mir-34b/mir-34c   | aggaagagagTTTTTTTGGAGTTTTTTAGGGAT       | cagtaatacgactcactataggagaaggctAAAAATACCAAACCTCCCTTC        |
| chr21 | 16,828,628  | 16,829,184  | mir-99a/let-7c    | aggaagagagTATTTTTGGTTGATGGGTAGAAAAA     | cagtaatacgactcactataggagaaggctCCAATCAAAAAAACAAAAAAACA      |
| chr11 | 121,476,136 | 121,476,612 | mir-125b-1        | aggaagagagTATAAATGATTGAAGAGAAAATAGGAGGT | cagtaatacgactcactataggagaaggctCTCTAAAAAAATTTACTACTCCCC     |
| chr21 | 16,882,554  | 16,882,936  | mir-125b-2        | aggaagagagTTGTTTTTATTGATTGATTGTTT       | cagtaatacgactcactataggagaaggctCCCTAAAAAAATAAAAAATTTCC      |
